# Supplementary material for: First-principles prediction of two-dimensional MnOX (X = Cl, Br) monolayers: the half-metallic multiferroics with magnetoelastic coupling
Source: Royal Society of Chemistry journal article supplement (doi:10.1039/d2nr05764f), 2023-01-01
Supplement: d2nr05764f1.pdf [file d2nr05764f1.pdf]

Supplementary materials for  
**First-principles Prediction of Two-dimensional  
MnOX (X=Cl, Br) Monolayers: The Half-metallic  
Multiferroics with Magnetoelastic Coupling**

Yulin Feng<sup>a</sup>, Zilong Wang<sup>a</sup>, Na Liu<sup>\*a</sup> and Qing Yang<sup>\*b</sup>

<sup>a</sup>College of Physics and Electronic Science, Hubei Normal University, Huangshi 435002, China

<sup>b</sup>Beijing National Laboratory for Condensed Matter Physics and Institute of Physics, Chinese Academy of Sciences, Beijing 100190, China

Email: liuna@hbnu.edu.cn

yang\_qing@iphy.ac.cn

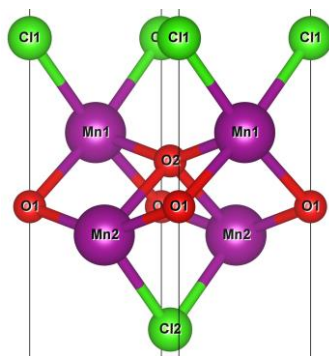

Fig. S1. The geometry structure of the MnOCl monolayer along the 110 axis.

Table S1. The structure parameters of MnOX monolayers. The lattice constants (Å), bond lengths (Å) and bond angles (degree) based on PBE functional.

|       | Lattice constants(Å)     | Bond lengths (Å) |      | Bond angles(degree)  |       |
|-------|--------------------------|------------------|------|----------------------|-------|
| MnOCl | $a = 3.34$<br>$b = 3.78$ | Mn1-O1           | 2.13 | $\angle$ Mn1-O1-Mn2  | 99.3  |
|       |                          | Mn1-O2           | 1.96 | $\angle$ Mn2-O2-Mn2  | 103.0 |
|       |                          | Mn1-Cl1          | 2.38 | $\angle$ Mn1-Cl1-Mn1 | 89.2  |
| MnOBr | $a = 3.42$<br>$b = 3.83$ | Mn1-O1           | 2.12 | $\angle$ Mn1-O1-Mn2  | 98.4  |
|       |                          | Mn1-O2           | 1.98 | $\angle$ Mn2-O2-Mn2  | 107.7 |
|       |                          | Mn1-Br1          | 2.53 | $\angle$ Mn1-Br1-Mn1 | 84.8  |

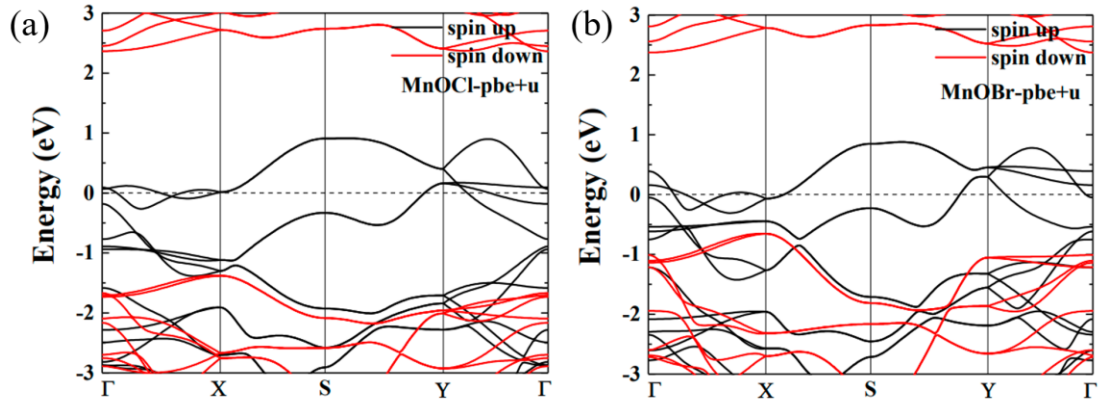

Fig. S2. Band structures of monolayer MnOCl and MnOBr based on PBE+U.

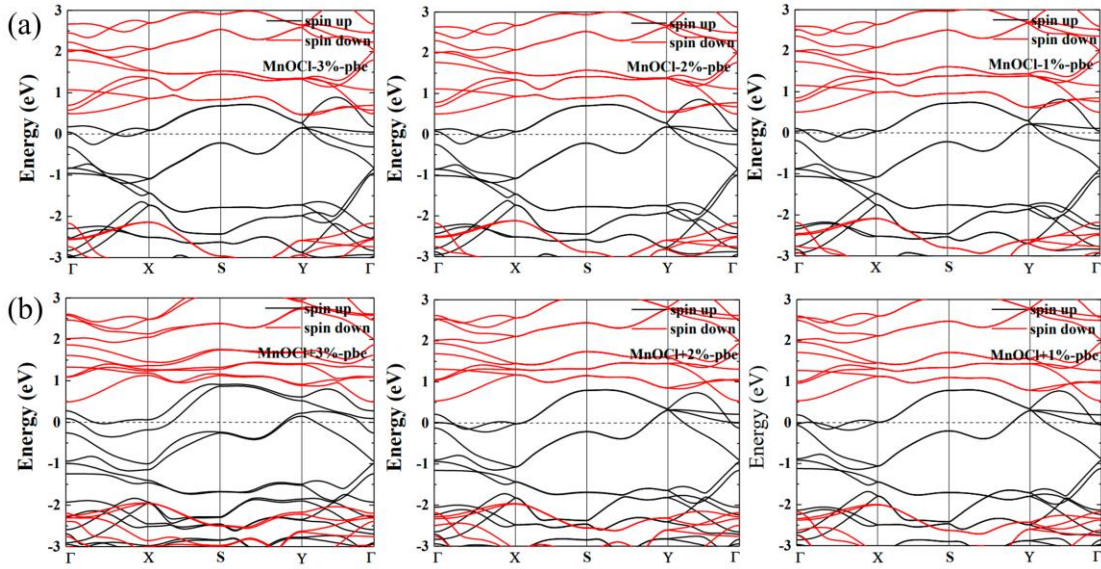

Fig. S3. Band structures of Monolayer MnOCl under biaxial (a) compressive strain and (b) tensile strain.

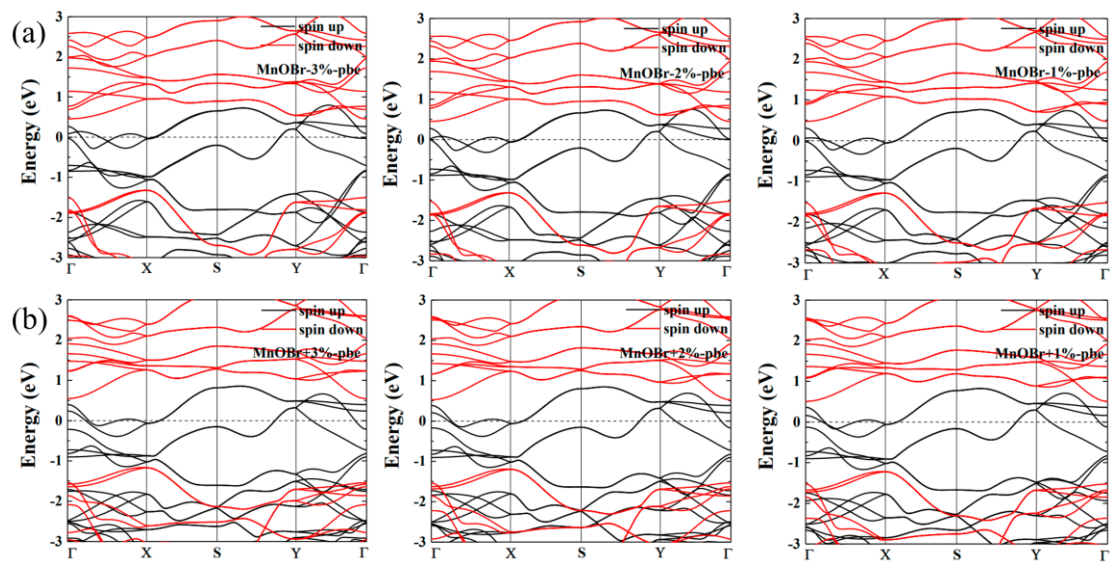

Fig. S4. Band structures of Monolayer MnOBr under biaxial (a) compressive strain and (b) tensile strain.

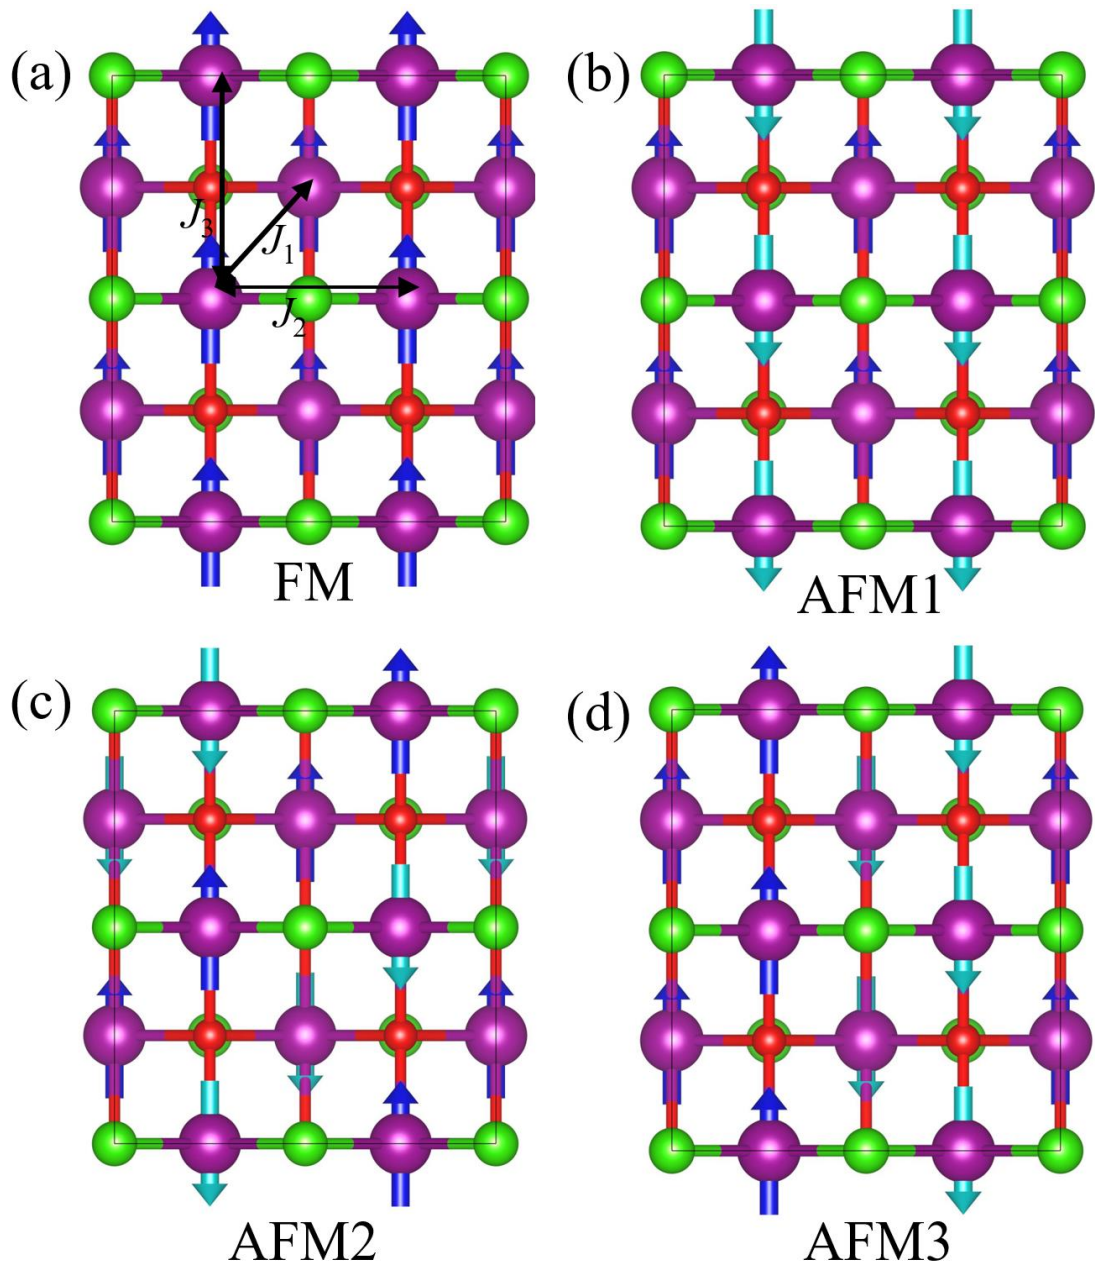

Fig. S5. Possible four magnetic configurations: (a) FM, (b) AFM1, (c) AFM3, (d) AFM4.  $J_1$ ,  $J_2$  and  $J_3$  present the magnetic exchange interaction between the first-nearest, second-nearest and third nearest Mn atom, respectively.

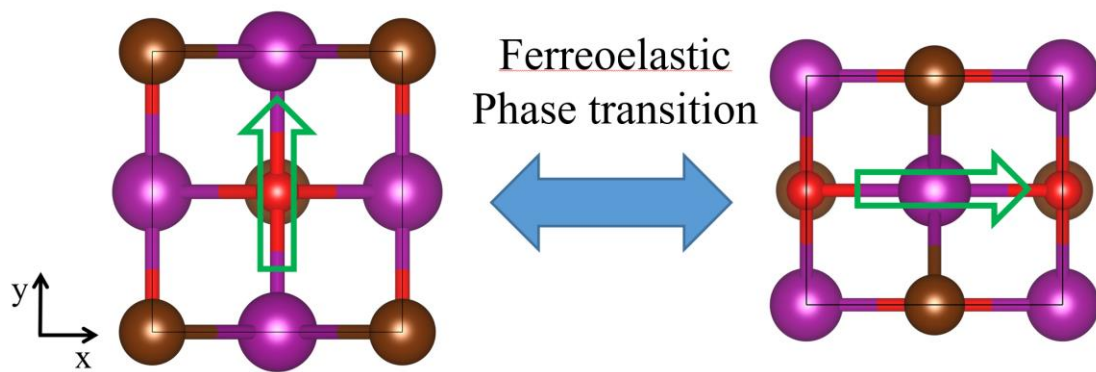

Fig. S6. Magnetoelastic coupling in MnOBr monolayer. Blue arrows present the net magnetic moment directions.

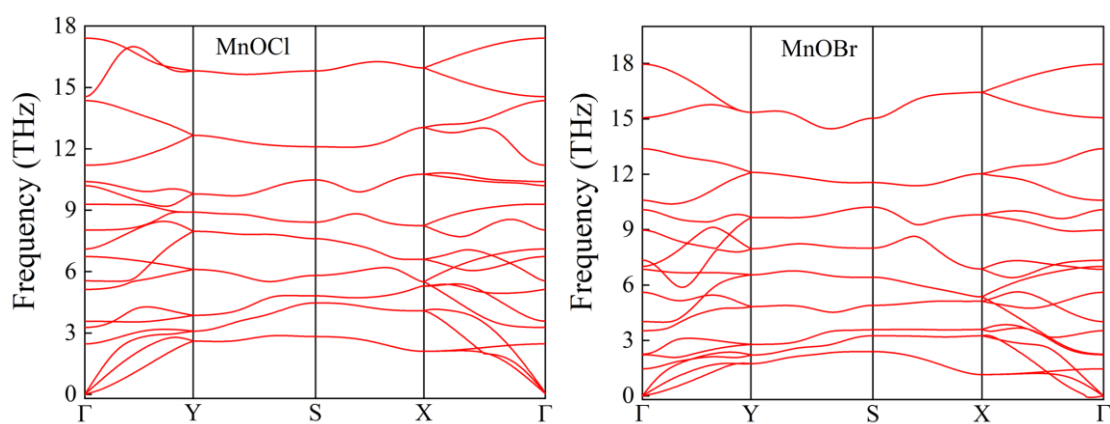

Fig. S7. Phonon dispersion spectrums of 2D MnOX monolayers.

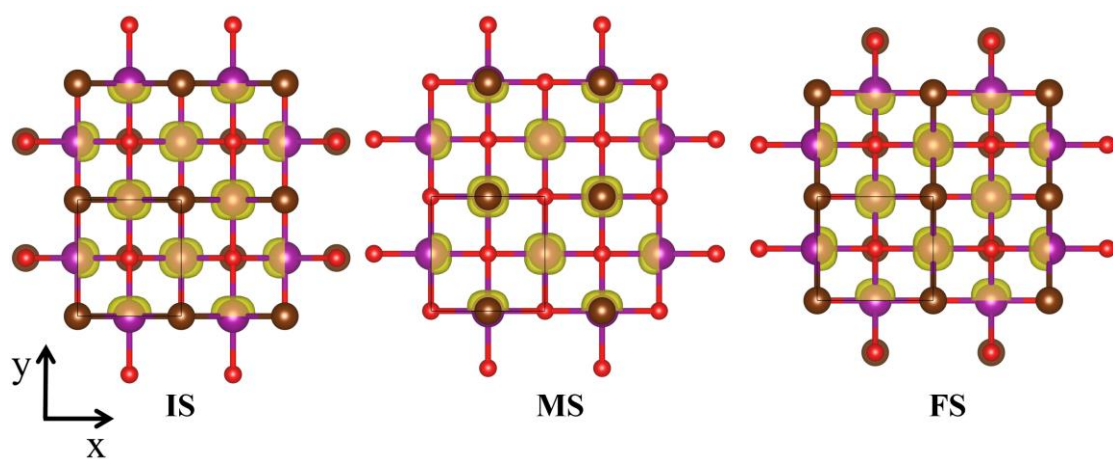

Fig S8. Spin charge densities of the IS, MS and FS states in the MnOBr monolayer (isosurface value of  $0.07 e/\text{Bohr}^3$ ).

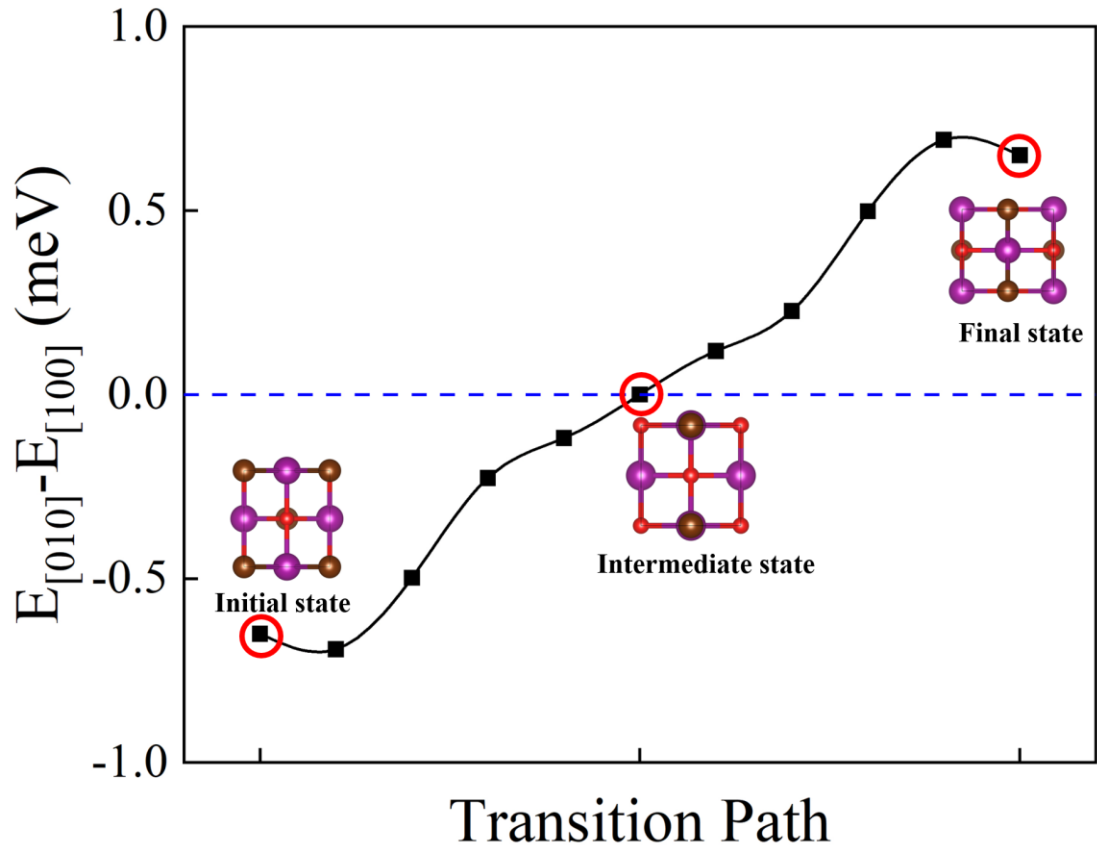

Fig S9. the changes of the MAE in the ferroelastic phase transition of the MnOBr monolayer.
